# Supplementary material for: Evaluating the economic impact of water scarcity in a changing world
Source: PubMed Central journal article supplement (PMC7997906; doi:10.1038/s41467-021-22194-0), 2021-03-26
Supplement: 41467_2021_22194_MOESM1_ESM.pdf [file 41467_2021_22194_MOESM1_ESM.pdf]

Supplementary Information

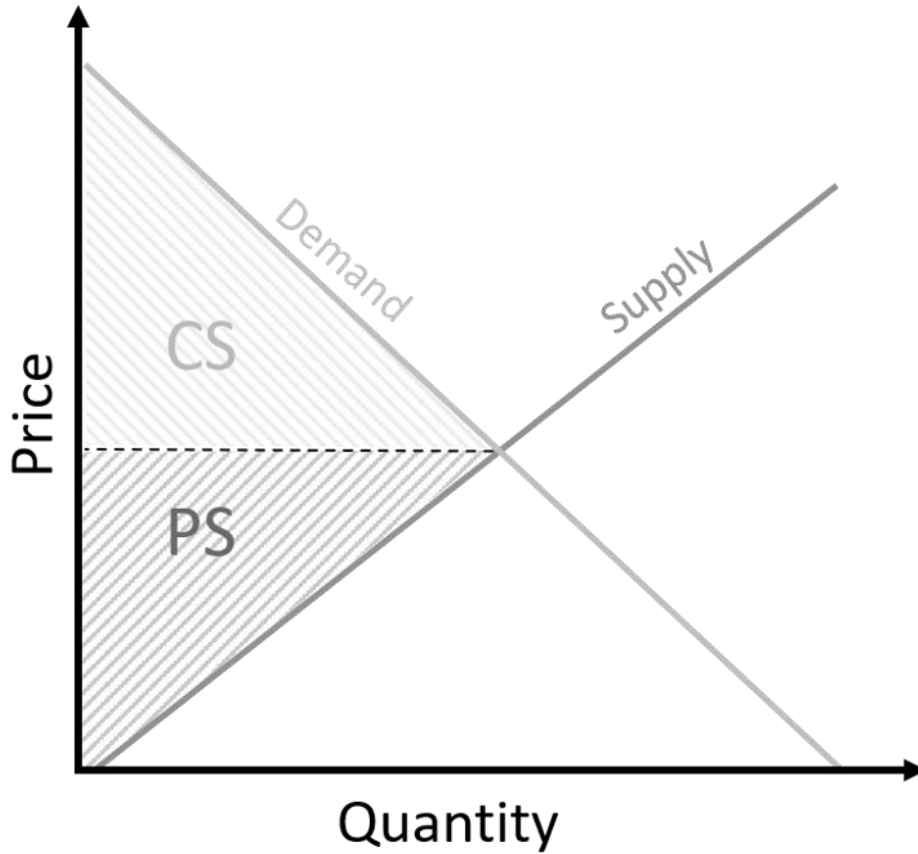

Supplementary Figure 1 Economic surplus: Consumer surplus (CS) and producer surplus (PS) are differentiated by the equilibrium price of a good (the price at which supply intersects with demand). The sum of these areas is the total surplus and has units of dollars.

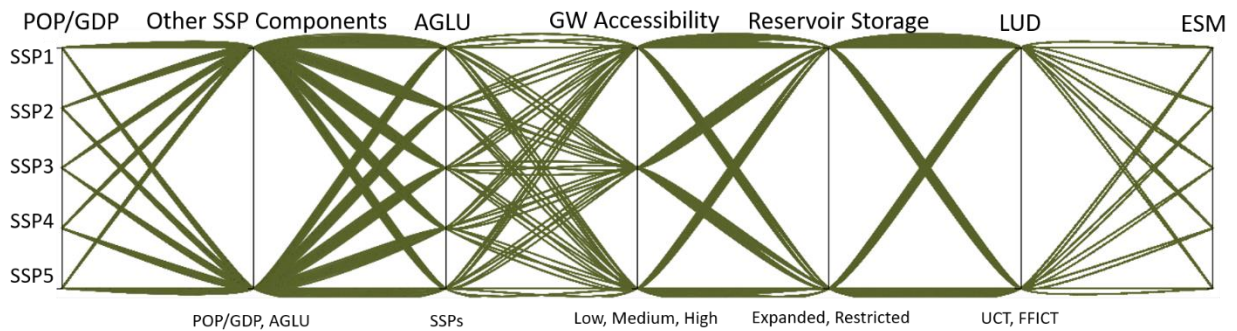

Supplementary Figure 2 Experimental design: The factorial sampling of the experimental design.

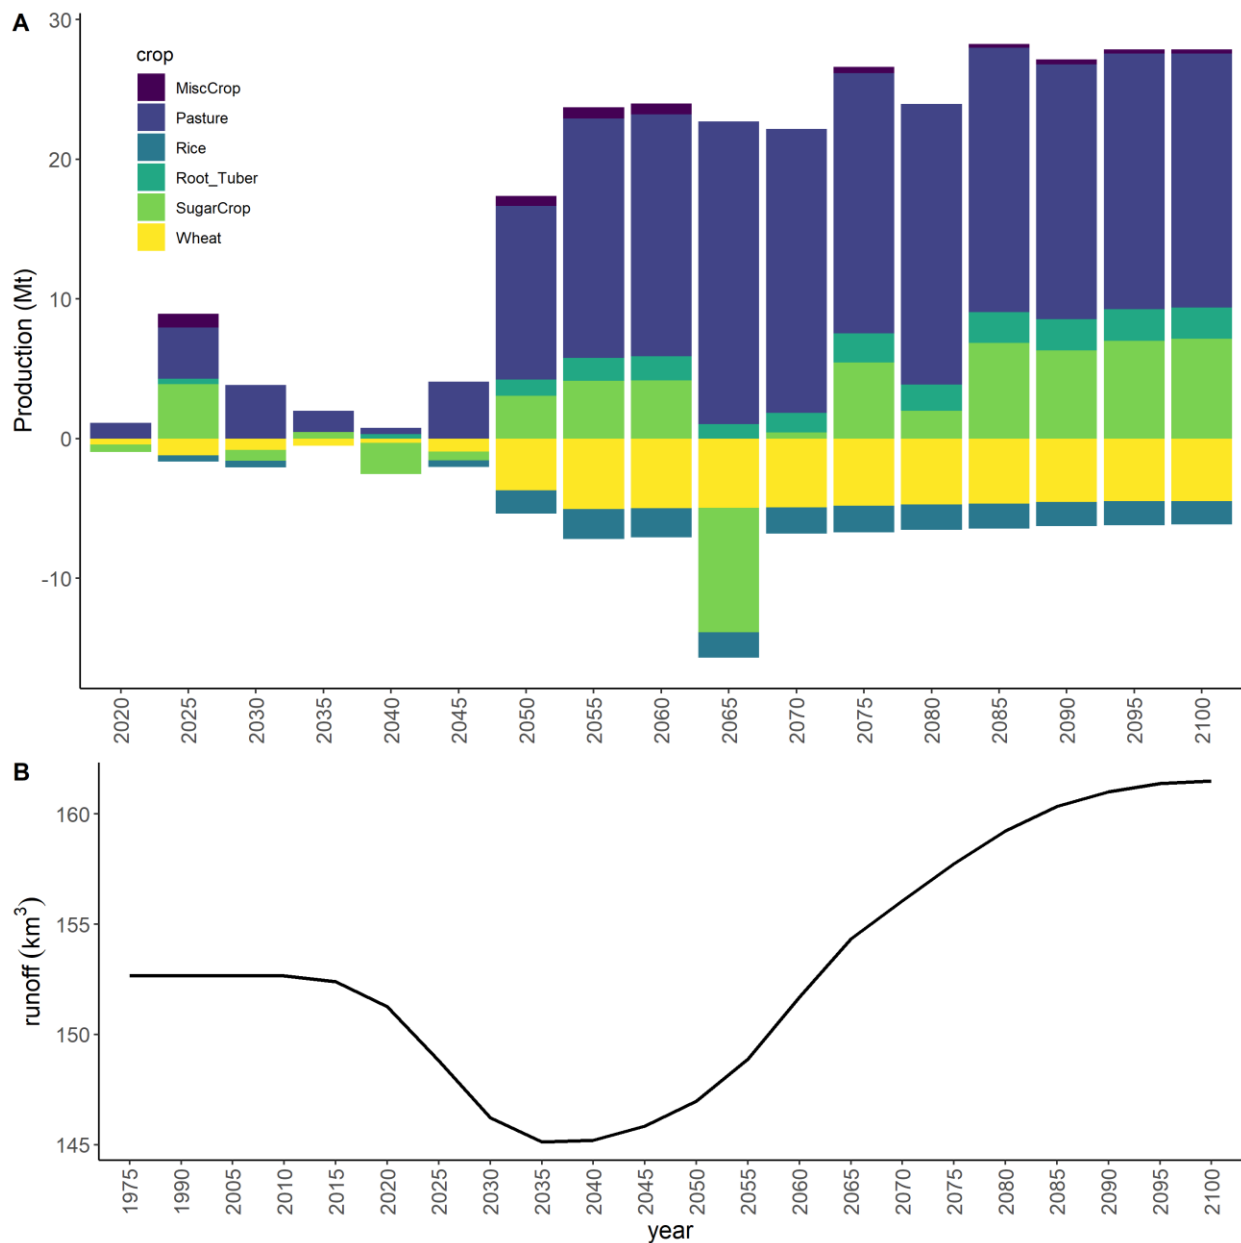

*Supplementary Figure 3 Agricultural production-runoff relationship: The difference in agricultural production between the constrained water scenario and the unlimited water scenario. A) This scenario pair has SSP 5 socioeconomics, SSP 4 agriculture, SSP 4 assumptions in the other dimensions and the UCT. The constrained scenario has low groundwater availability, expanded reservoir storage and is forced with NorESM. This scenario has the highest positive impact over time in the ensemble in the Indus Basin. Increases in pasture are due to increased dairy production. The runoff is plotted in B).*

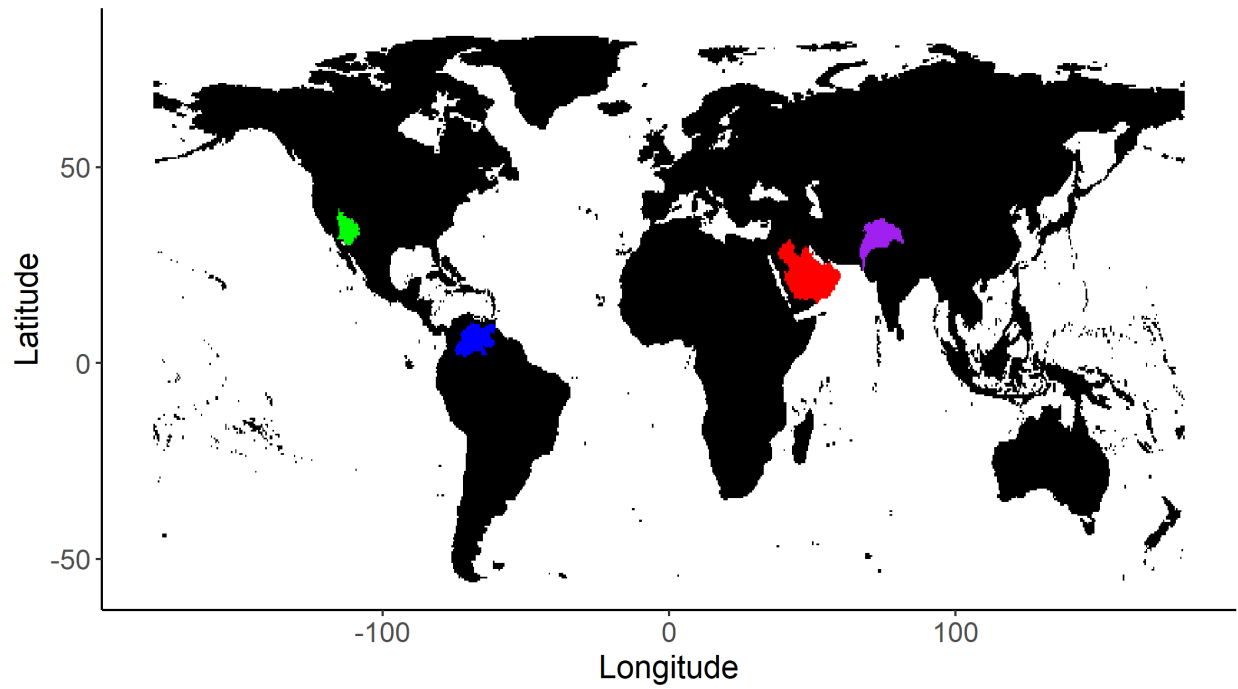

*Supplementary Figure 4 Location of highlighted basins: The basins highlighted in this study. The Lower Colorado River Basin (green), the Orinoco Basin (blue), the Arabian Peninsula (red), and the Indus Basin (purple).*

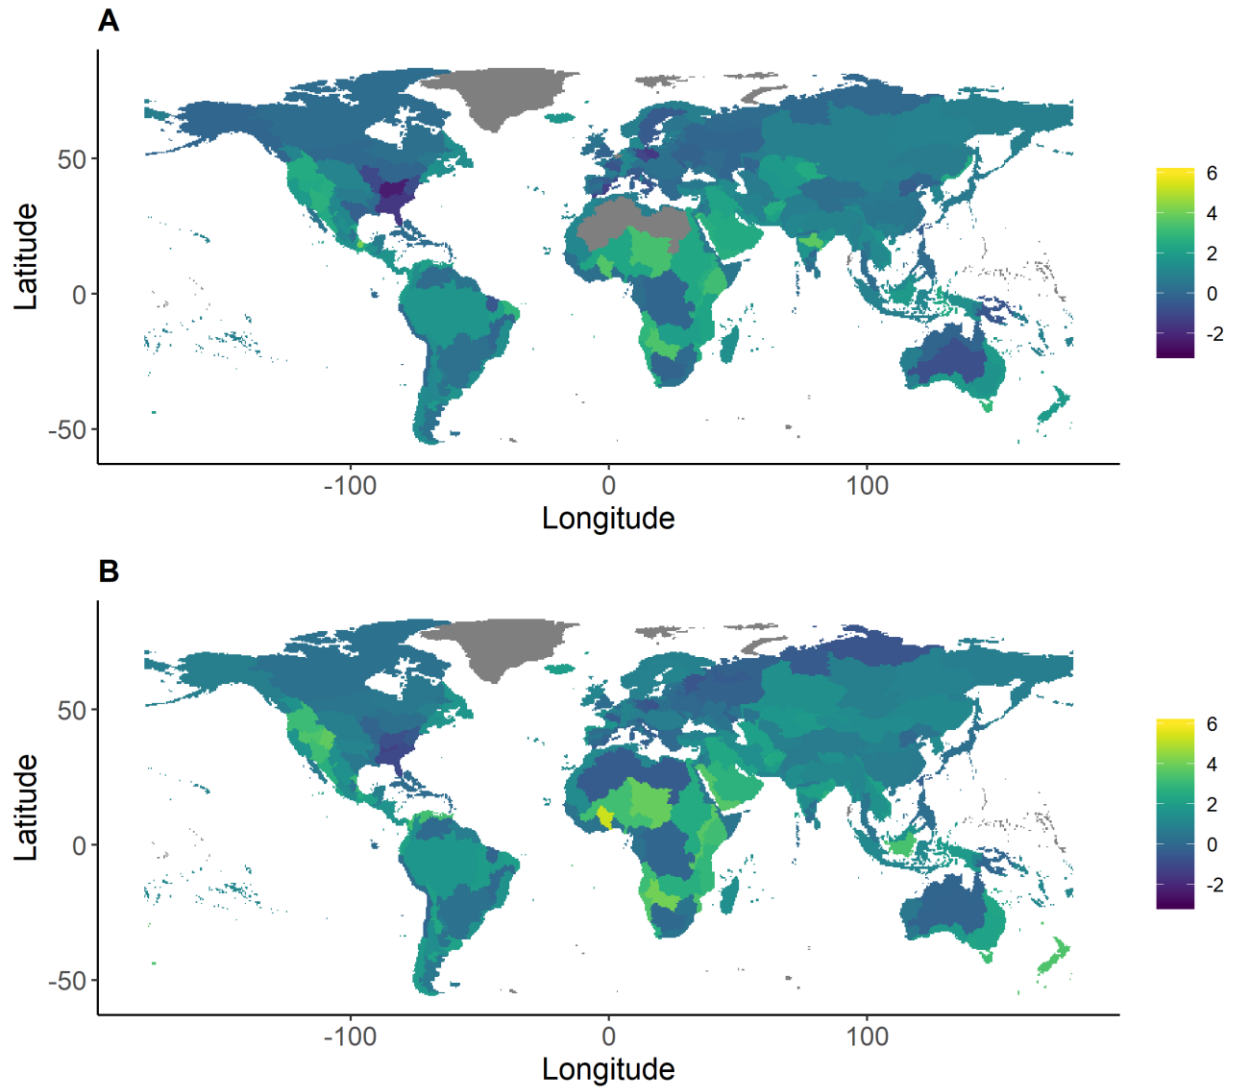

*Supplementary Figure 5 Climate uncertainty amplification ratios: Log transforms of the maximum climate uncertainty amplification ratios in each basin in a single scenario with SSP 1 (A) and SSP 5 (B) demand assumptions and low water supply assumptions. Higher amplification ratios arise in higher demand scenarios.*

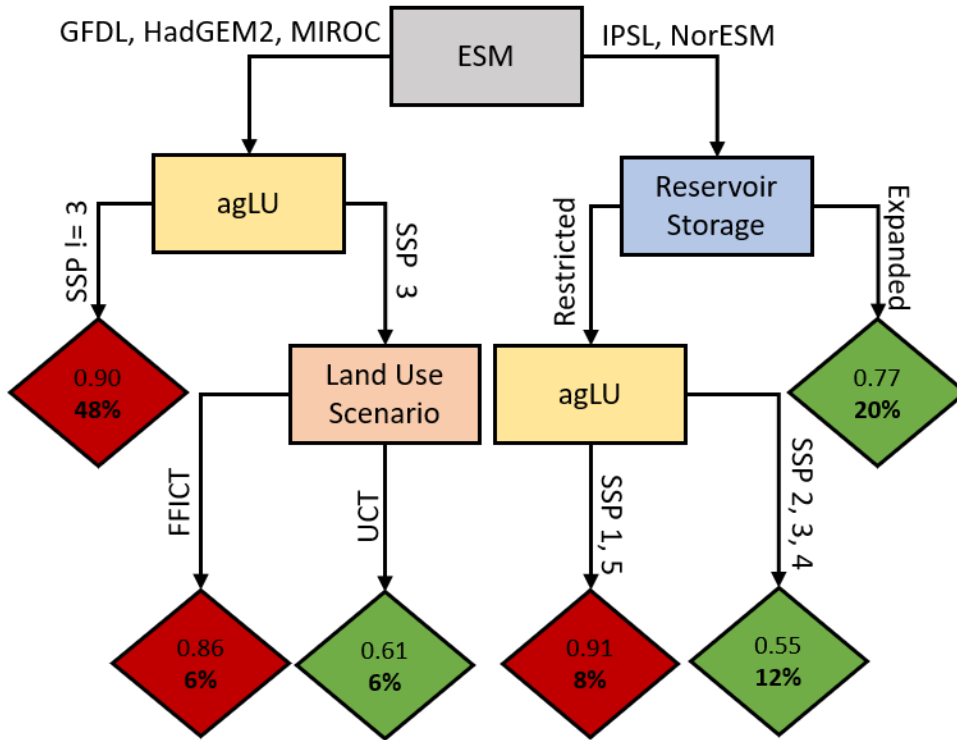

Supplementary Figure 6 Arabian Peninsula classification tree of sign of economic impact: CART classification of positive versus negative economic impact summed over time in the Arabian Peninsula. Red end nodes represent negative impact subgroups and green end nodes represent positive impact subgroups. The fraction at the top of each node shows the purity of each node. For instance, a red node with 0.91 shows that 91% of scenarios in that subgroup are negative. The percentage in each end node is the percent of scenarios out of the total within that subgroup. Earth System Model forcing is the most influential factor in determining if impact is positive or negative.

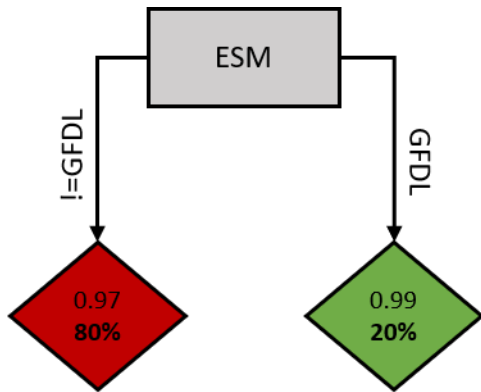

*Supplementary Figure 7 Lower Colorado River classification tree of sign of economic impact: CART classification of positive versus negative economic impact summed over time in the Lower CO River Basin. Red end nodes represent negative impact subgroups and green end nodes represent positive impact subgroups. The fraction at the top of each node shows the purity of each node. For instance, a red node with 0.97 shows that 97% of scenarios in that subgroup are negative. The percentage in each end node is the percent of scenarios out of the total within that subgroup. Earth System Model forcing is the most influential factor in determining if impact is positive or negative.*

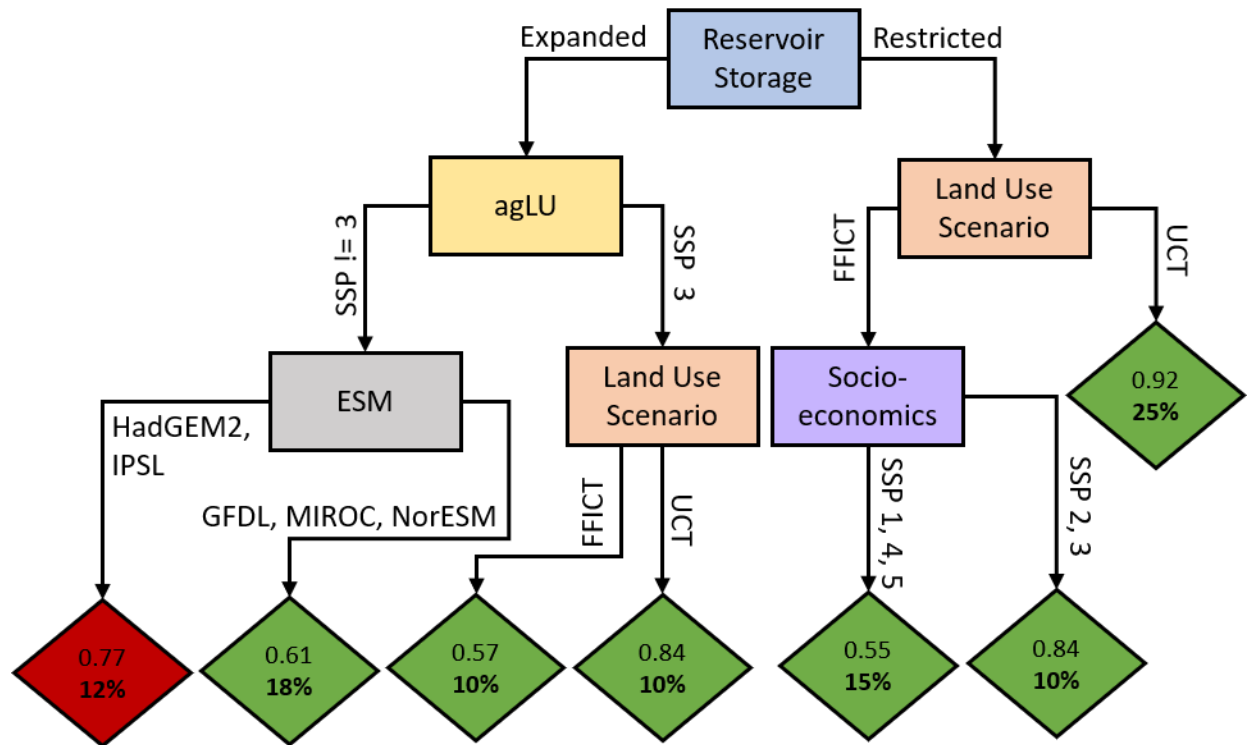

Supplementary Figure 8 Orinoco classification tree of sign of economic impact: CART classification of positive versus negative economic impact summed over time in the Orinoco Basin. Red end nodes represent negative impact subgroups and green end nodes represent positive impact subgroups. The fraction at the top of each node shows the purity of each node. For instance, a red node with 0.77 shows that 77% of scenarios in that subgroup are negative. The percentage in each end node is the percent of scenarios out of the total within that subgroup. Earth System Model forcing is one of the most influential factor in determining if impact is positive or negative.

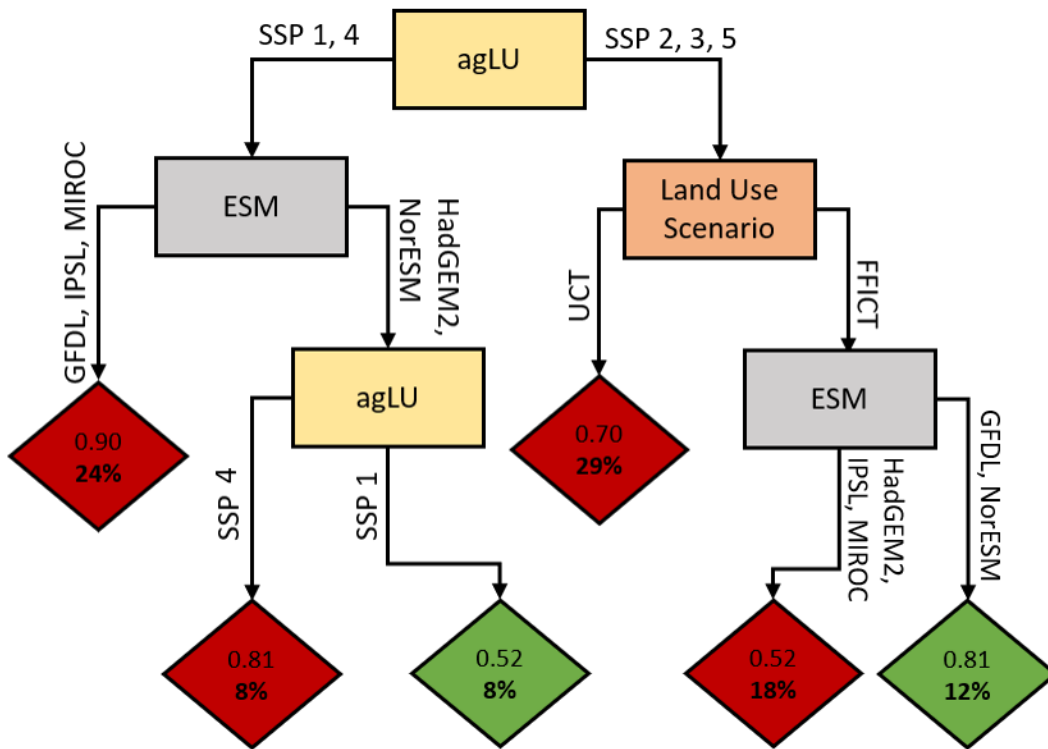

Supplementary Figure 9 Indus classification tree of sign of economic impact: CART classification of positive versus negative economic impact summed over time in the Indus Basin. Red end nodes represent negative impact subgroups and green end nodes represent positive impact subgroups. The fraction at the top of each node shows the purity of each node. For instance, a red node with 0.81 shows that 81% of scenarios in that subgroup are negative. The percentage in each end node is the percent of scenarios out of the total within that subgroup. Earth System Model forcing is one of the most influential factor in determining if impact is positive or negative.



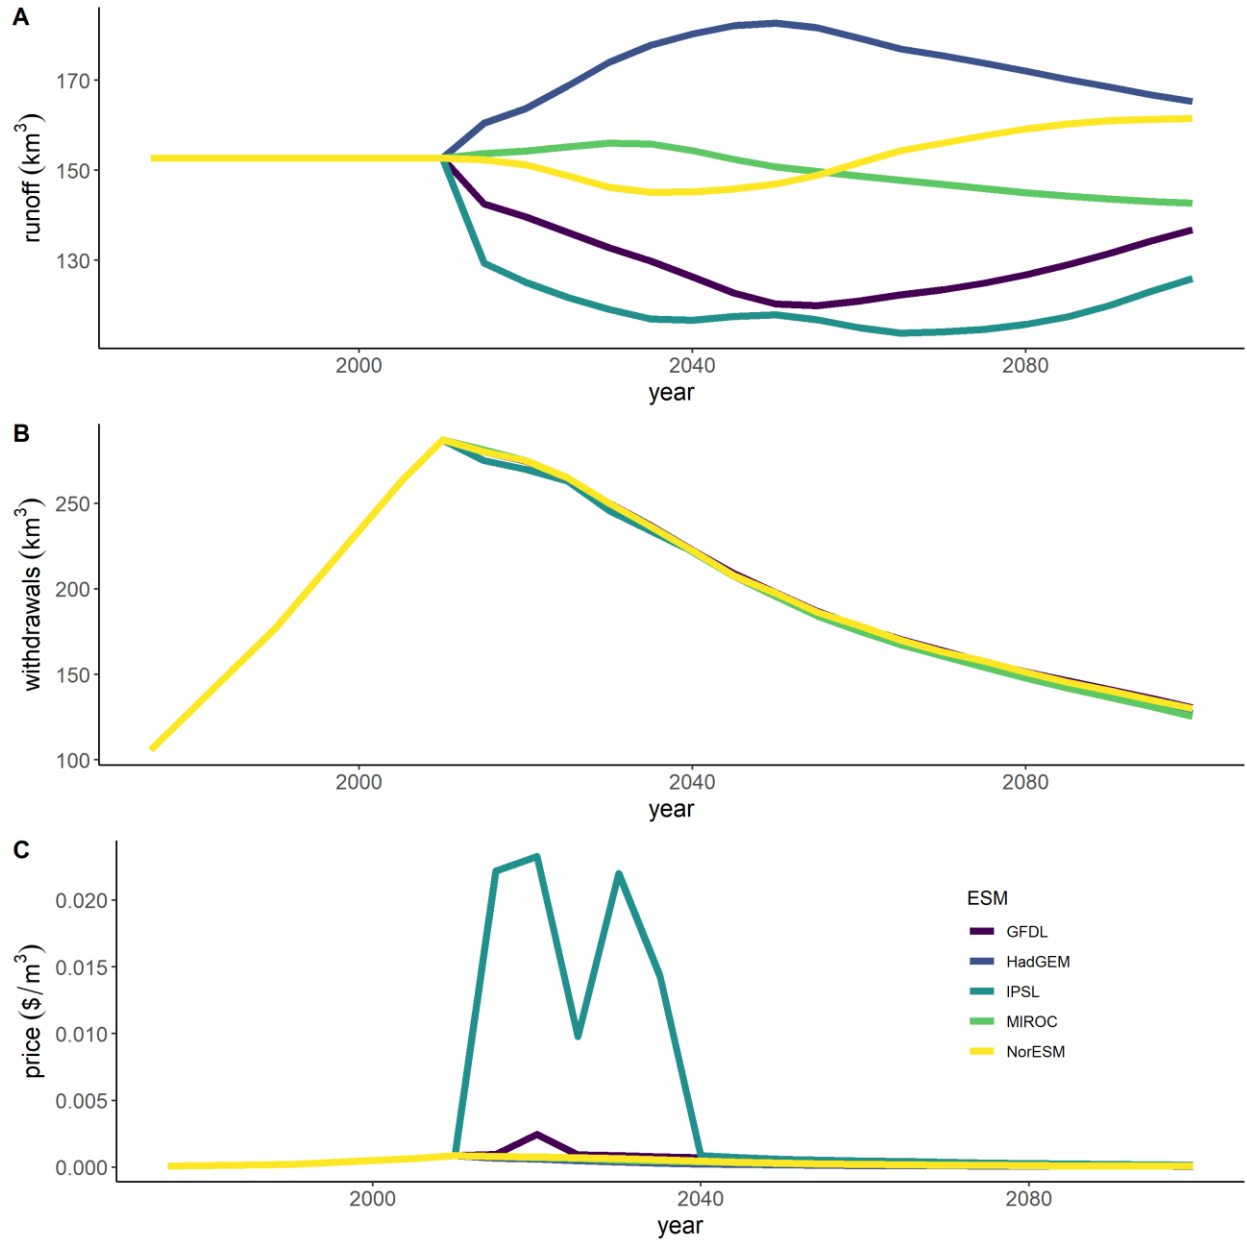

Supplementary Figure 10 Runoff-water price relationship: Runoff A), withdrawals B), and water price C) plotted for each ESM in the Indus Basin. The group of scenarios plotted corresponds to those in Figure 2 B. Changes in supply coupled with static demand leads to variations in the price of water.

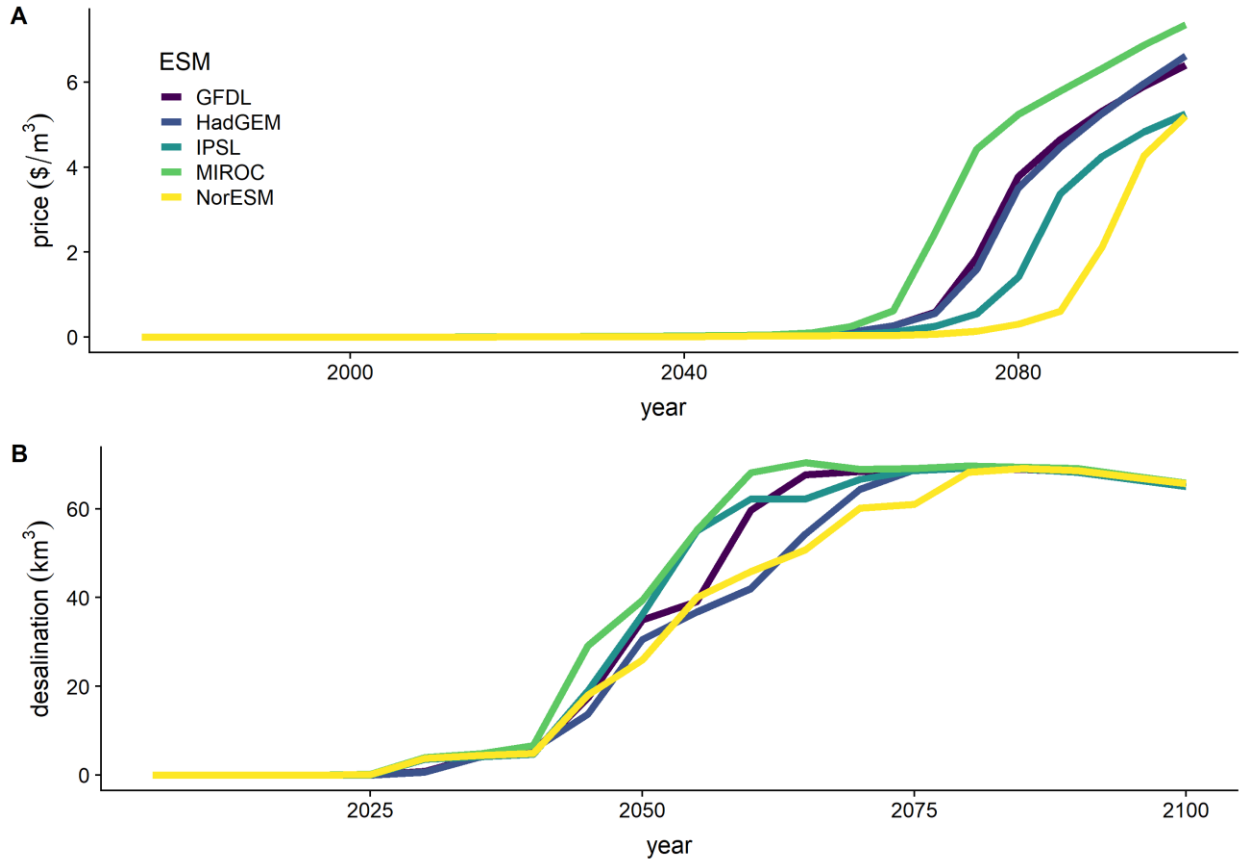

*Supplementary Figure 11 Desalination-water price relationship: Water price A) and desalination production B) plotted for each ESM in the Arabian Peninsula. The group of scenarios plotted corresponds to those in Figure 2 E. The price of water increases as alternative sources of water, such as desalination, are used.*

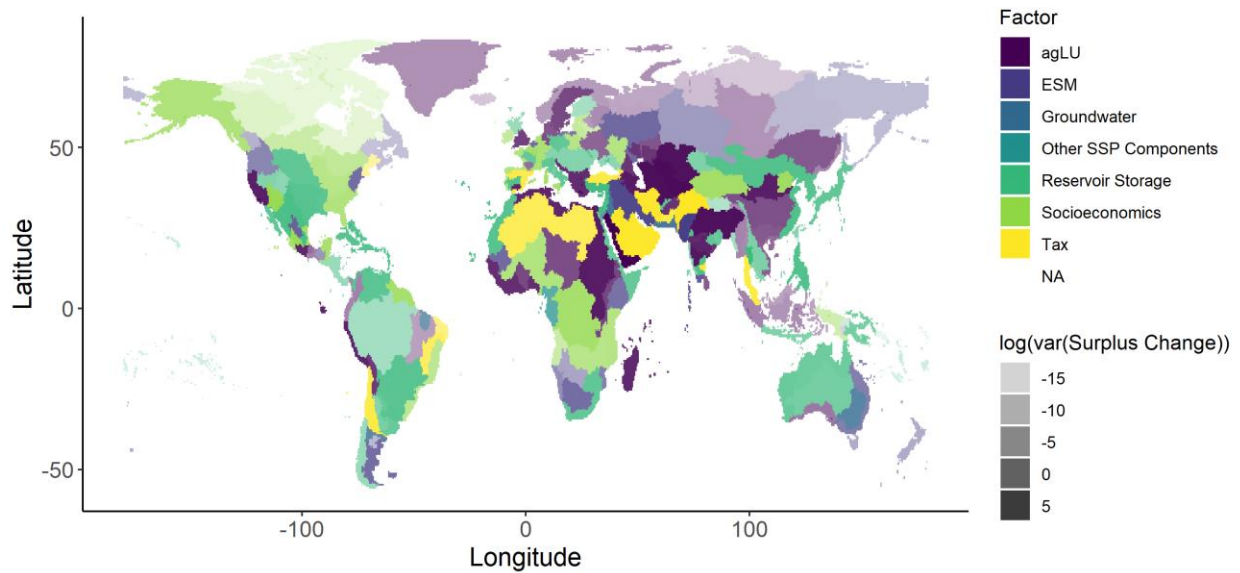

*Supplementary Figure 12 First node of regression tree of economic impact: The first factor in a CART regression of the economic impact of water scarcity summed over time. All dimensions in the experimental design are the most influential factor in determining economic impact in some basin. Basins are shaded according to the magnitude of their variance.*

| Hydrologic Basin                    | Percent Positive Scenarios |
|-------------------------------------|----------------------------|
| Adriatic Sea-Greece-Black Sea Coast | 82.1                       |
| Africa-East Central Coast           | 58.7                       |
| Africa-Indian Ocean Coast           | 70.7                       |
| Africa-North Interior               | 89.7                       |
| Africa-North West Coast             | 85.4                       |
| Africa-Red Sea-Gulf of Aden Coast   | 49                         |
| Africa-South Interior               | 23                         |
| Africa-West Coast                   | 78.9                       |
| Amazon                              | 94.4                       |
| Amu Darya                           | 27.9                       |
| Amur                                | 85.1                       |
| Angola-Coast                        | 66.6                       |
| Arabian Peninsula                   | 30.6                       |
| Arabian Sea Coast                   | 62.4                       |
| Arctic Ocean Islands                | 95                         |
| Arkansas White Red                  | 91.6                       |
| Atlantic Ocean Seaboard             | 95.7                       |
| Australia-East Coast                | 83.9                       |

| Hydrologic Basin                 | Percent Positive Scenarios |
|----------------------------------|----------------------------|
| Australia-Interior               | 94                         |
| Australia-North Coast            | 92.2                       |
| Australia-South Coast            | 81.4                       |
| Australia-West Coast             | 75.8                       |
| Baja California                  | 63.3                       |
| Baltic Sea Coast                 | 87.4                       |
| Bay of Bengal-North East Coast   | 1.9                        |
| Black Sea-North Coast            | 92.7                       |
| Black Sea-South Coast            | 77.4                       |
| Bo Hai-Korean Bay-North Coast    | 82.4                       |
| Brahamani                        | 0.3                        |
| California River                 | 76.7                       |
| Caribbean                        | 89.9                       |
| Caribbean Coast                  | 86.5                       |
| Caspian Sea Coast                | 83.7                       |
| Caspian Sea-East Coast           | 52.6                       |
| Caspian Sea-South West Coast     | 54.3                       |
| Cauvery                          | 19.5                       |
| Central Iran                     | 31.7                       |
| Central Patagonia Highlands      | 56.2                       |
| Chao Phraya                      | 16.1                       |
| China Coast                      | 89.4                       |
| Churchill                        | 34.8                       |
| Colombia-Ecuador-Pacific Coast   | 36.6                       |
| Congo                            | 33.8                       |
| Danube                           | 35.9                       |
| Daugava                          | 93.6                       |
| Dead Sea                         | 43.3                       |
| Denmark-Germany Coast            | 59.8                       |
| Dnieper                          | 93.9                       |
| Dniester                         | 92                         |
| Don                              | 78.4                       |
| Douro                            | 56.3                       |
| East Brazil-South Atlantic Coast | 50                         |
| Eastern Jordan-Syria             | 24.3                       |
| Ebro                             | 88.2                       |
| Elbe                             | 93.6                       |
| Ems-Weser                        | 63.7                       |
| England and Wales                | 68                         |

| Hydrologic Basin       | Percent Positive Scenarios |
|------------------------|----------------------------|
| Farahrud               | 64.9                       |
| Finland                | 59.1                       |
| Fly                    | 18.3                       |
| France-South Coast     | 89.4                       |
| France-West Coast      | 59.4                       |
| Fraser                 | 96                         |
| Ganges-Bramaputra      | 77.1                       |
| Gironde                | 79.9                       |
| Gobi Interior          | 87.7                       |
| Godavari               | 39.9                       |
| Great                  | 84.2                       |
| Great Lakes            | 55.7                       |
| Grijalva-Usumacinta    | 30.3                       |
| Guadalquivir           | 35.1                       |
| Guadiana               | 25.2                       |
| Gulf of Guinea         | 35.7                       |
| Gulf of Thailand Coast | 92.5                       |
| Hainan                 | 68.7                       |
| Hamun-i-Mashkel        | 57.7                       |
| Hawaii                 | 45                         |
| Helmand                | 74.8                       |
| Hong-Red River         | 35.7                       |
| Huang He               | 82.6                       |
| Hudson Bay Coast       | 46.8                       |
| Iceland                | 78.4                       |
| India East Coast       | 17.8                       |
| India North East Coast | 18                         |
| India South Coast      | 38.3                       |
| India West Coast       | 0.3                        |
| Indus                  | 33.9                       |
| Ireland                | 58.7                       |
| Irian Jaya Coast       | 92.1                       |
| Irrawaddy              | 56.4                       |
| Isthmus of Tehuantepec | 73.8                       |
| Italy-East Coast       | 92.3                       |
| Italy-West Coast       | 92.9                       |
| Japan                  | 65.7                       |
| Java-Timor             | 83.1                       |
| Kalimantan             | 92.7                       |

| Hydrologic Basin                     | Percent Positive Scenarios |
|--------------------------------------|----------------------------|
| Kara Sea Coast                       | 92.3                       |
| Krishna                              | 42.2                       |
| La Plata                             | 94.5                       |
| La Puna Region                       | 65.2                       |
| Lake Balkash                         | 79.6                       |
| Lake Chad                            | 23.5                       |
| Lena                                 | 40.4                       |
| Limpopo                              | 79.7                       |
| Loire                                | 90.2                       |
| Lower Colorado River                 | 21.5                       |
| Lower Mississippi River              | 79.9                       |
| Mackenzie                            | 32.6                       |
| Madagascar                           | 90.9                       |
| Magdalena                            | 64.9                       |
| Mahandi                              | 0.3                        |
| Mahi                                 | 25.1                       |
| Mar Chiquita                         | 94.9                       |
| Mediterranean Sea Islands            | 87.9                       |
| Mediterranean Sea-East Coast         | 30.6                       |
| Mediterranean South Coast            | 79.3                       |
| Mekong                               | 86.9                       |
| Mexico-Interior                      | 73.1                       |
| Mexico-Northwest Coast               | 39.3                       |
| Mid Atlantic                         | 89                         |
| Missouri River                       | 88.7                       |
| Murray-Darling                       | 49.5                       |
| Namibia-Coast                        | 68.7                       |
| Narmada                              | 79.9                       |
| Narva                                | 88.3                       |
| Negro                                | 83.8                       |
| Neman                                | 91.9                       |
| Neva                                 | 87.6                       |
| New England                          | 90.5                       |
| New Zealand                          | 43.6                       |
| Niger                                | 23.2                       |
| Nile                                 | 91.7                       |
| North and South Korea                | 91.7                       |
| North Argentina-South Atlantic Coast | 73.2                       |
| North Borneo Coast                   | 47.6                       |

| Hydrologic Basin                             | Percent Positive Scenarios |
|----------------------------------------------|----------------------------|
| North Brazil-South Atlantic Coast            | 93.9                       |
| North Chile-Pacific Coast                    | 92                         |
| North Gulf                                   | 33.3                       |
| Northeast South America-South Atlantic Coast | 82.8                       |
| Northern Dvina                               | 92.3                       |
| Northwest Territories                        | 33.8                       |
| Ob                                           | 61.1                       |
| Oder                                         | 95                         |
| Ohio River                                   | 91                         |
| Orange                                       | 85.7                       |
| Orinoco                                      | 62.3                       |
| Pacific and Arctic Coast                     | 95                         |
| Pacific Central Coast                        | 58.1                       |
| Pacific Northwest                            | 76.8                       |
| Palau and East Indonesia                     | 93                         |
| Pampas Region                                | 84.8                       |
| Papaloapan                                   | 62.5                       |
| Papua New Guinea Coast                       | 83.6                       |
| Parnaiba                                     | 68.6                       |
| Peninsula Malaysia                           | 89.5                       |
| Pennar                                       | 14.6                       |
| Persian Gulf Coast                           | 56.3                       |
| Peru-Pacific Coast                           | 57.8                       |
| Philippines                                  | 94.2                       |
| Plateau of Tibet Interior                    | 33.8                       |
| Po                                           | 91.9                       |
| Poland Coast                                 | 91.5                       |
| Red Sea-East Coast                           | 1.5                        |
| Rhine                                        | 64                         |
| Rhone                                        | 61.3                       |
| Rift Valley                                  | 43.1                       |
| Rio Balsas                                   | 64.1                       |
| Rio Grande River                             | 54                         |
| Rio Lerma                                    | 46.9                       |
| Rio Verde                                    | 49.6                       |
| Russia-Barents Sea Coast                     | 92.6                       |
| Russia-South East Coast                      | 73.2                       |
| Sabarmati                                    | 34.9                       |

| Hydrologic Basin                     | Percent Positive Scenarios |
|--------------------------------------|----------------------------|
| Salinas Grandes                      | 86.1                       |
| Salween                              | 66.2                       |
| Sao Francisco                        | 94.5                       |
| Saskatchewan-Nelson                  | 69.7                       |
| Scandinavia-North Coast              | 76.7                       |
| Scheldt                              | 91.2                       |
| Scotland                             | 58.9                       |
| Seine                                | 81.8                       |
| Senegal                              | 53.3                       |
| Sepik                                | 11.2                       |
| Shebelli-Juba                        | 57.1                       |
| Siberia-North Coast                  | 92.4                       |
| Siberia-West Coast                   | 62                         |
| Sinai Peninsula                      | 49.8                       |
| Sittang                              | 59.2                       |
| Solomon Islands                      | 10.1                       |
| South Africa-South Coast             | 92.7                       |
| South Africa-West Coast              | 88.5                       |
| South America-Colorado               | 82.8                       |
| South Argentina-South Atlantic Coast | 79.8                       |
| South Atlantic Gulf                  | 93.7                       |
| South Chile-Pacific Coast            | 89.4                       |
| South China Sea Coast                | 73.1                       |
| South Pacific Islands                | 10                         |
| Southern Central America             | 36.9                       |
| Spain-Portugal-Atlantic Coast        | 65.4                       |
| Spain-South and East Coast           | 46.8                       |
| Sri Lanka                            | 65.2                       |
| St Lawrence                          | 86.3                       |
| Sulawesi                             | 92.4                       |
| Sumatra                              | 79.4                       |
| Sweden                               | 82.5                       |
| Syr Darya                            | 49.2                       |
| Tagus                                | 64.6                       |
| Taiwan                               | 94.7                       |
| Tapti                                | 48.3                       |
| Tarim Interior                       | 85.3                       |
| Tasmania                             | 90.1                       |
| Tennessee River                      | 95                         |



| Hydrologic Basin                    | Percent Positive Scenarios |
|-------------------------------------|----------------------------|
| Texas Gulf Coast                    | 92.6                       |
| Tiber                               | 66.8                       |
| Tigris-Euphrates                    | 28                         |
| Tocantins                           | 67.6                       |
| Upper Colorado River                | 94.3                       |
| Upper Mississippi                   | 90.8                       |
| Ural                                | 42.1                       |
| Uruguay-Brazil-South Atlantic Coast | 82.2                       |
| Viet Nam-Coast                      | 43.9                       |
| Volga                               | 86.5                       |
| Volta                               | 16.5                       |
| Wisla                               | 91                         |
| Xun Jiang                           | 69.3                       |
| Yangtze                             | 79.8                       |
| Yasai                               | 1.3                        |
| Yenisey                             | 76.4                       |
| Yucatan Peninsula                   | 69.1                       |
| Zambezi                             | 65.3                       |
| Ziya He-Interior                    | 89.6                       |

*SI Table 1: Percent positive scenarios in each basin across the scenario ensemble.*
